# Supplementary material for: Calcium content and high calcium adaptation of plants in karst areas of southwestern Hunan, China
Source: Copernicus journal article supplement (doi:10.5194/bg-15-2991-2018), 2018-05-17
Supplement: Supplementary file 1 [file bg-15-2991-2018-supplement.zip]

Archive with 2 entries (2 files):
- Supplementary material.xlsx
- bg-15-2991-2018-supplement-title-page.pdf
