# Supplementary material for: Calcium content and high calcium adaptation of plants in karst areas of southwestern Hunan, China
Source: Copernicus journal article supplement (doi:10.5194/bg-15-2991-2018), 2018-05-17
Supplement: Supplementary file 1 [file bg-15-2991-2018-supplement.zip › bg-15-2991-2018-supplement-title-page.pdf]

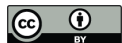

## *Supplement of*

# **Calcium content and high calcium adaptation of plants in karst areas of southwestern Hunan, China**

**Xiaocong Wei et al.**

*Correspondence to:* Xiangwen Deng (dxwfree@126.com)

- [bg-15-2991-2018-supplement-title-page.pdf](#)
- [Supplementary material.xlsx](#)

The copyright of individual parts of the supplement might differ from the CC BY 4.0 License.
