# Supplementary material for: Calcium content and high calcium adaptation of plants in karst areas of southwestern Hunan, China
Source: Copernicus journal article supplement (doi:10.5194/bg-15-2991-2018), 2018-05-17
Supplement: Supplementary file 1 [file bg-15-2991-2018-supplement.zip › Supplementary material.xlsx]

## Sheet: Plant Ca content
LRD, light rocky desertification; MRD, moderate rocky desertification; IRD, intense rocky desertification. Biennial herbs were gathered to the “annual herbs” and deciduous trees with a height less than 2m or a ground diameter less than 3 cm were gathered to the “deciduous shrubs”. Branches and leaves were treated together as the aboveground part, while the belowground section only 95 included roo…
RecNum	Sample areas	Slope position	Small quadrats	Vegetable layer	System development type	Life form	PP	Nitrogen-fixing function	Plant Species	Organt	Organt1	Ca content(g/kg)
1	LRD	lower	non-rocky side	shrub	dicotyledons	deciduous shrubs	C3	non-nitrogen-fixing	Abelia chinensis	branch	above	7.6632
2	LRD	lower	non-rocky side	shrub	dicotyledons	deciduous shrubs	C3	non-nitrogen-fixing	Abelia chinensis	leaf	above	27.459
3	LRD	lower	non-rocky side	shrub	dicotyledons	deciduous shrubs	C3	non-nitrogen-fixing	Abelia chinensis	root	below	0.871857
4	LRD	lower	non-rocky side	shrub	dicotyledons	evergreen shrubs	C3	non-nitrogen-fixing	Loropetalum chinense	branch	above	28.6721
5	LRD	lower	non-rocky side	shrub	dicotyledons	evergreen shrubs	C3	non-nitrogen-fixing	Loropetalum chinense	leaf	above	30.7752
6	LRD	lower	non-rocky side	shrub	dicotyledons	evergreen shrubs	C3	non-nitrogen-fixing	Loropetalum chinense	root	below	13.6244
7	LRD	lower	non-rocky side	shrub	dicotyledons	evergreen shrubs	C3	non-nitrogen-fixing	Ilex chinensis	branch	above	11.0355
8	LRD	lower	non-rocky side	shrub	dicotyledons	evergreen shrubs	C3	non-nitrogen-fixing	Ilex chinensis	leaf	above	19.3617
9	LRD	lower	non-rocky side	shrub	dicotyledons	evergreen shrubs	C3	non-nitrogen-fixing	Ilex chinensis	root	below	25.6842
10	LRD	lower	non-rocky side	herb	monocotyledons	perennial herbs	C4	non-nitrogen-fixing	Imperata cylindrica	leaf	above	8.9143
11	LRD	lower	non-rocky side	herb	monocotyledons	perennial herbs	C4	non-nitrogen-fixing	Imperata cylindrica	root	below	1.35093
12	LRD	lower	non-rocky side	herb	monocotyledons	perennial herbs	C4	non-nitrogen-fixing	Miscanthus sinensis	leaf	above	4.34008
13	LRD	lower	non-rocky side	herb	monocotyledons	perennial herbs	C4	non-nitrogen-fixing	Miscanthus sinensis	root	below	2.87946
14	LRD	lower	non-rocky side	shrub	dicotyledons	deciduous shrubs	C4	non-nitrogen-fixing	Glochidion puberum	branch	above	11.1261
15	LRD	lower	non-rocky side	shrub	dicotyledons	deciduous shrubs	C4	non-nitrogen-fixing	Glochidion puberum	leaf	above	25.0969
16	LRD	lower	non-rocky side	shrub	dicotyledons	deciduous shrubs	C4	non-nitrogen-fixing	Glochidion puberum	root	below	5.33308
17	LRD	lower	non-rocky side	shrub	dicotyledons	deciduous shrubs	C3	non-nitrogen-fixing	Castanea henryi	branch	above	12.9887
18	LRD	lower	non-rocky side	shrub	dicotyledons	deciduous shrubs	C3	non-nitrogen-fixing	Castanea henryi	leaf	above	13.9662
19	LRD	lower	non-rocky side	shrub	dicotyledons	deciduous shrubs	C3	non-nitrogen-fixing	Castanea henryi	root	below	20.5182
20	LRD	lower	non-rocky side	shrub	dicotyledons	evergreen shrubs	C3	non-nitrogen-fixing	Symplocos chinensis	branch	above	19.8368
21	LRD	lower	non-rocky side	shrub	dicotyledons	evergreen shrubs	C3	non-nitrogen-fixing	Symplocos chinensis	leaf	above	20.0147
22	LRD	lower	non-rocky side	shrub	dicotyledons	evergreen shrubs	C3	non-nitrogen-fixing	Symplocos chinensis	root	below	13.9531
23	LRD	lower	non-rocky side	herb	monocotyledons	annual herbs	C4	non-nitrogen-fixing	Digitaria sanguinalis	leaf	above	5.46184
24	LRD	lower	non-rocky side	herb	monocotyledons	annual herbs	C4	non-nitrogen-fixing	Digitaria sanguinalis	root	below	5.32868
25	LRD	lower	non-rocky side	herb	monocotyledons	perennial herbs	C4	non-nitrogen-fixing	Themeda japonica	leaf	above	2.14649
26	LRD	lower	non-rocky side	herb	monocotyledons	perennial herbs	C4	non-nitrogen-fixing	Themeda japonica	root	below	0.420956
27	LRD	lower	rocky side	shrub	dicotyledons	deciduous shrubs	C3	non-nitrogen-fixing	Rhus chinensis	branch	above	16.7528
28	LRD	lower	rocky side	shrub	dicotyledons	deciduous shrubs	C3	non-nitrogen-fixing	Rhus chinensis	leaf	above	24.3613
29	LRD	lower	rocky side	shrub	dicotyledons	deciduous shrubs	C3	non-nitrogen-fixing	Rhus chinensis	root	below	14.8318
30	LRD	lower	rocky side	shrub	dicotyledons	evergreen shrubs	C3	non-nitrogen-fixing	Pyracantha fortuneana	branch	above	9.15914
31	LRD	lower	rocky side	shrub	dicotyledons	evergreen shrubs	C3	non-nitrogen-fixing	Pyracantha fortuneana	leaf	above	22.0048
32	LRD	lower	rocky side	shrub	dicotyledons	evergreen shrubs	C3	non-nitrogen-fixing	Pyracantha fortuneana	root	below	19.2803
33	LRD	lower	rocky side	herb	dicotyledons	annual herbs	C4	non-nitrogen-fixing	Artemisia carvifolia	leaf	above	15.3439
34	LRD	lower	rocky side	herb	dicotyledons	annual herbs	C4	non-nitrogen-fixing	Artemisia carvifolia	root	below	6.59845
35	LRD	lower	rocky side	herb	dicotyledons	perennial herbs	C4	non-nitrogen-fixing	Dendranthema indicum	leaf	above	21.2798
36	LRD	lower	rocky side	herb	dicotyledons	perennial herbs	C4	non-nitrogen-fixing	Dendranthema indicum	root	below	2.96671
37	LRD	middle	non-rocky side	shrub	dicotyledons	deciduous shrubs	C3	non-nitrogen-fixing	Castanea henryi	branch	above	24.0335
38	LRD	middle	non-rocky side	shrub	dicotyledons	deciduous shrubs	C3	non-nitrogen-fixing	Castanea henryi	leaf	above	38.7358
39	LRD	middle	non-rocky side	shrub	dicotyledons	deciduous shrubs	C3	non-nitrogen-fixing	Castanea henryi	root	below	24.0439
40	LRD	middle	non-rocky side	shrub	dicotyledons	evergreen shrubs	C3	non-nitrogen-fixing	Serissa japonica	branch	above	13.8151
41	LRD	middle	non-rocky side	shrub	dicotyledons	evergreen shrubs	C3	non-nitrogen-fixing	Serissa japonica	leaf	above	31.5488
42	LRD	middle	non-rocky side	shrub	dicotyledons	evergreen shrubs	C3	non-nitrogen-fixing	Serissa japonica	root	below	4.27381
43	LRD	middle	non-rocky side	shrub	dicotyledons	deciduous shrubs	C3	non-nitrogen-fixing	Vitex negundo	branch	above	5.63673
44	LRD	middle	non-rocky side	shrub	dicotyledons	deciduous shrubs	C3	non-nitrogen-fixing	Vitex negundo	leaf	above	18.1994
45	LRD	middle	non-rocky side	shrub	dicotyledons	deciduous shrubs	C3	non-nitrogen-fixing	Vitex negundo	root	below	2.83404
46	LRD	middle	non-rocky side	herb	dicotyledons	perennial herbs	C3	non-nitrogen-fixing	Patrinia scabiosaefolia	leaf	above	20.7521
47	LRD	middle	non-rocky side	herb	dicotyledons	perennial herbs	C3	non-nitrogen-fixing	Patrinia scabiosaefolia	root	below	15.4591
48	LRD	middle	non-rocky side	herb	monocotyledons	perennial herbs	C4	non-nitrogen-fixing	Themeda japonica	leaf	above	4.38926
49	LRD	middle	non-rocky side	herb	monocotyledons	perennial herbs	C4	non-nitrogen-fixing	Themeda japonica	root	below	4.03357
50	LRD	middle	non-rocky side	shrub	dicotyledons	deciduous shrubs	C3	non-nitrogen-fixing	Rosa cymosa	branch	above	18.4334
51	LRD	middle	non-rocky side	shrub	dicotyledons	deciduous shrubs	C3	non-nitrogen-fixing	Rosa cymosa	leaf	above	26.3304
52	LRD	middle	non-rocky side	shrub	dicotyledons	deciduous shrubs	C3	non-nitrogen-fixing	Rosa cymosa	root	below	9.91393
53	LRD	middle	non-rocky side	shrub	dicotyledons	deciduous shrubs	C3	nitrogen-fixing	Indigofera tinctoria	branch	above	11.2814
54	LRD	middle	non-rocky side	shrub	dicotyledons	deciduous shrubs	C3	nitrogen-fixing	Indigofera tinctoria	leaf	above	29.4333
55	LRD	middle	non-rocky side	shrub	dicotyledons	deciduous shrubs	C3	nitrogen-fixing	Indigofera tinctoria	root	below	9.83165
56	LRD	middle	non-rocky side	shrub	dicotyledons	evergreen shrubs	C3	non-nitrogen-fixing	Symplocos chinensis	branch	above	21.7051
57	LRD	middle	non-rocky side	shrub	dicotyledons	evergreen shrubs	C3	non-nitrogen-fixing	Symplocos chinensis	leaf	above	24.5664
58	LRD	middle	non-rocky side	shrub	dicotyledons	evergreen shrubs	C3	non-nitrogen-fixing	Symplocos chinensis	root	below	9.76716
59	LRD	middle	non-rocky side	herb	monocotyledons	perennial herbs	C4	non-nitrogen-fixing	Miscanthus sinensis	leaf	above	5.68503
60	LRD	middle	non-rocky side	herb	monocotyledons	perennial herbs	C4	non-nitrogen-fixing	Miscanthus sinensis	root	below	3.85135
61	LRD	middle	non-rocky side	herb	dicotyledons	perennial herbs	C3	non-nitrogen-fixing	Sanguisorba officinalis	leaf	above	17.682
62	LRD	middle	non-rocky side	herb	dicotyledons	perennial herbs	C3	non-nitrogen-fixing	Sanguisorba officinalis	root	below	13.4147
63	LRD	middle	rocky side	shrub	dicotyledons	deciduous shrubs	C3	non-nitrogen-fixing	Abelia chinensis	branch	above	13.5134
64	LRD	middle	rocky side	shrub	dicotyledons	deciduous shrubs	C3	non-nitrogen-fixing	Abelia chinensis	leaf	above	29.1973
65	LRD	middle	rocky side	shrub	dicotyledons	deciduous shrubs	C3	non-nitrogen-fixing	Abelia chinensis	root	below	4.23377
66	LRD	middle	rocky side	herb	dicotyledons	perennial herbs	C3	non-nitrogen-fixing	Viola philippica	leaf	above	23.1074
67	LRD	middle	rocky side	herb	dicotyledons	perennial herbs	C3	non-nitrogen-fixing	Viola philippica	root	below	19.9356
68	LRD	middle	rocky side	herb	dicotyledons	annual herbs	C4	non-nitrogen-fixing	Artemisia carvifolia	leaf	above	17.5084
69	LRD	middle	rocky side	herb	dicotyledons	annual herbs	C4	non-nitrogen-fixing	Artemisia carvifolia	root	below	9.98388
70	LRD	upper	non-rocky side	shrub	dicotyledons	deciduous shrubs	C3	non-nitrogen-fixing	Abelia chinensis	branch	above	11.9092
71	LRD	upper	non-rocky side	shrub	dicotyledons	deciduous shrubs	C3	non-nitrogen-fixing	Abelia chinensis	leaf	above	27.3591
72	LRD	upper	non-rocky side	shrub	dicotyledons	deciduous shrubs	C3	non-nitrogen-fixing	Abelia chinensis	root	below	1.83641
73	LRD	upper	non-rocky side	shrub	dicotyledons	deciduous shrubs	C3	non-nitrogen-fixing	Castanea mollissima	branch	above	24.275
74	LRD	upper	non-rocky side	shrub	dicotyledons	deciduous shrubs	C3	non-nitrogen-fixing	Castanea mollissima	leaf	above	18.989
75	LRD	upper	non-rocky side	shrub	dicotyledons	deciduous shrubs	C3	non-nitrogen-fixing	Castanea mollissima	root	below	18.9352
76	LRD	upper	non-rocky side	herb	dicotyledons	annual herbs	C3	non-nitrogen-fixing	Salvia plebeia	root	below	1.99879
77	LRD	upper	non-rocky side	herb	dicotyledons	perennial herbs	C3	non-nitrogen-fixing	Patrinia scabiosaefolia	leaf	above	23.8978
78	LRD	upper	non-rocky side	herb	dicotyledons	perennial herbs	C3	non-nitrogen-fixing	Patrinia scabiosaefolia	root	below	7.05872
79	LRD	upper	non-rocky side	shrub	dicotyledons	deciduous shrubs	C3	non-nitrogen-fixing	Populus adenopoda	branch	above	20.9939
80	LRD	upper	non-rocky side	shrub	dicotyledons	deciduous shrubs	C3	non-nitrogen-fixing	Populus adenopoda	leaf	above	17.7102
81	LRD	upper	non-rocky side	shrub	dicotyledons	deciduous shrubs	C3	non-nitrogen-fixing	Populus adenopoda	root	below	20.1268
82	LRD	upper	non-rocky side	shrub	dicotyledons	deciduous shrubs	C4	non-nitrogen-fixing	Mallotus apelta	branch	above	33.6237
83	LRD	upper	non-rocky side	shrub	dicotyledons	deciduous shrubs	C4	non-nitrogen-fixing	Mallotus apelta	leaf	above	32.8764
84	LRD	upper	non-rocky side	shrub	dicotyledons	deciduous shrubs	C4	non-nitrogen-fixing	Mallotus apelta	root	below	12.0768
85	LRD	upper	non-rocky side	shrub	dicotyledons	deciduous shrubs	C3	nitrogen-fixing	Lespedeza bicolor	leaf	above	17.7872
86	LRD	upper	non-rocky side	shrub	dicotyledons	deciduous shrubs	C3	nitrogen-fixing	Lespedeza bicolor	root	below	13.6342
87	LRD	upper	non-rocky side	herb	dicotyledons	perennial herbs	C4	non-nitrogen-fixing	Aster baccharoides	leaf	above	16.158
88	LRD	upper	non-rocky side	herb	dicotyledons	perennial herbs	C4	non-nitrogen-fixing	Aster baccharoides	root	below	6.24939
89	LRD	upper	rocky side	shrub	dicotyledons	deciduous shrubs	C3	non-nitrogen-fixing	Grewia biloba	branch	above	30.3674
90	LRD	upper	rocky side	shrub	dicotyledons	deciduous shrubs	C3	non-nitrogen-fixing	Grewia biloba	leaf	above	29.8849
91	LRD	upper	rocky side	shrub	dicotyledons	deciduous shrubs	C3	non-nitrogen-fixing	Grewia biloba	root	below	35.851
92	LRD	upper	rocky side	shrub	monocotyledons	evergreen shrubs	C3	non-nitrogen-fixing	Smilax china	branch	above	7.76449
93	LRD	upper	rocky side	shrub	monocotyledons	evergreen shrubs	C3	non-nitrogen-fixing	Smilax china	leaf	above	27.2018
94	LRD	upper	rocky side	shrub	monocotyledons	evergreen shrubs	C3	non-nitrogen-fixing	Smilax china	root	below	3.11372
95	LRD	upper	rocky side	shrub	dicotyledons	deciduous shrubs	C3	non-nitrogen-fixing	Broussonetia kaempferi	branch	above	18.0429
96	LRD	upper	rocky side	shrub	dicotyledons	deciduous shrubs	C3	non-nitrogen-fixing	Broussonetia kaempferi	leaf	above	32.9918
97	LRD	upper	rocky side	shrub	dicotyledons	deciduous shrubs	C3	non-nitrogen-fixing	Broussonetia kaempferi	root	below	14.4132
98	LRD	upper	rocky side	herb	dicotyledons	perennial herbs	C4	non-nitrogen-fixing	Aster baccharoides	leaf	above	21.6127
99	LRD	upper	rocky side	herb	dicotyledons	perennial herbs	C4	non-nitrogen-fixing	Aster baccharoides	root	below	12.0157
100	LRD	upper	rocky side	herb	dicotyledons	perennial herbs	C4	non-nitrogen-fixing	Dendranthema indicum	leaf	above	21.3452
101	LRD	upper	rocky side	herb	dicotyledons	perennial herbs	C4	non-nitrogen-fixing	Dendranthema indicum	root	below	6.55624
102	MRD	lower	non-rocky side	shrub	dicotyledons	deciduous shrubs	C3	non-nitrogen-fixing	Vitex negundo	branch	above	16.4509
103	MRD	lower	non-rocky side	shrub	dicotyledons	deciduous shrubs	C3	non-nitrogen-fixing	Vitex negundo	leaf	above	24.7271
104	MRD	lower	non-rocky side	shrub	dicotyledons	deciduous shrubs	C3	non-nitrogen-fixing	Vitex negundo	root	below	6.509
105	MRD	lower	non-rocky side	shrub	dicotyledons	evergreen shrubs	C3	non-nitrogen-fixing	Pyracantha fortuneana	branch	above	12.654
106	MRD	lower	non-rocky side	shrub	dicotyledons	evergreen shrubs	C3	non-nitrogen-fixing	Pyracantha fortuneana	leaf	above	29.8432
107	MRD	lower	non-rocky side	shrub	dicotyledons	evergreen shrubs	C3	non-nitrogen-fixing	Pyracantha fortuneana	root	below	17.5015
108	MRD	lower	non-rocky side	herb	dicotyledons	perennial herbs	C4	non-nitrogen-fixing	Dendranthema indicum	leaf	above	20.969
109	MRD	lower	non-rocky side	herb	dicotyledons	perennial herbs	C4	non-nitrogen-fixing	Dendranthema indicum	root	below	4.95377
110	MRD	lower	non-rocky side	herb	dicotyledons	perennial herbs	C3	non-nitrogen-fixing	Clinopodium chinense	leaf	above	19.9656
111	MRD	lower	non-rocky side	herb	dicotyledons	perennial herbs	C3	non-nitrogen-fixing	Clinopodium chinense	root	below	9.23577
112	MRD	lower	non-rocky side	herb	monocotyledons	annual herbs	C4	non-nitrogen-fixing	Setaria glauca	leaf	above	11.0525
113	MRD	lower	non-rocky side	herb	monocotyledons	annual herbs	C4	non-nitrogen-fixing	Setaria glauca	root	below	6.46842
114	MRD	lower	non-rocky side	shrub	dicotyledons	evergreen shrubs	C3	non-nitrogen-fixing	Rosa laevigata	branch	above	23.9014
115	MRD	lower	non-rocky side	shrub	dicotyledons	evergreen shrubs	C3	non-nitrogen-fixing	Rosa laevigata	leaf	above	15.7581
116	MRD	lower	non-rocky side	shrub	dicotyledons	evergreen shrubs	C3	non-nitrogen-fixing	Rosa laevigata	root	below	12.1508
117	MRD	lower	non-rocky side	shrub	dicotyledons	evergreen shrubs	C3	non-nitrogen-fixing	Serissa japonica	branch	above	24.4953
118	MRD	lower	non-rocky side	shrub	dicotyledons	evergreen shrubs	C3	non-nitrogen-fixing	Serissa japonica	leaf	above	33.6558
119	MRD	lower	non-rocky side	shrub	dicotyledons	evergreen shrubs	C3	non-nitrogen-fixing	Serissa japonica	root	below	20.5145
120	MRD	lower	non-rocky side	herb	dicotyledons	annual herbs	C4	non-nitrogen-fixing	Artemisia carvifolia	leaf	above	19.3892
121	MRD	lower	non-rocky side	herb	dicotyledons	annual herbs	C4	non-nitrogen-fixing	Artemisia carvifolia	root	below	11.0415
122	MRD	lower	non-rocky side	herb	monocotyledons	perennial herbs	C4	non-nitrogen-fixing	Themeda japonica	leaf	above	5.46445
123	MRD	lower	non-rocky side	herb	monocotyledons	perennial herbs	C4	non-nitrogen-fixing	Themeda japonica	root	below	1.49691
124	MRD	lower	rocky side	shrub	dicotyledons	deciduous shrubs	C3	non-nitrogen-fixing	Rhus chinensis	branch	above	21.9268
125	MRD	lower	rocky side	shrub	dicotyledons	deciduous shrubs	C3	non-nitrogen-fixing	Rhus chinensis	leaf	above	26.7966
126	MRD	lower	rocky side	shrub	dicotyledons	deciduous shrubs	C3	non-nitrogen-fixing	Rhus chinensis	root	below	20.3759
127	MRD	lower	rocky side	shrub	dicotyledons	deciduous shrubs	C3	non-nitrogen-fixing	Liquidambar formosana	branch	above	21.2812
128	MRD	lower	rocky side	shrub	dicotyledons	deciduous shrubs	C3	non-nitrogen-fixing	Liquidambar formosana	leaf	above	41.7852
129	MRD	lower	rocky side	shrub	dicotyledons	deciduous shrubs	C3	non-nitrogen-fixing	Liquidambar formosana	root	below	30.6524
130	MRD	lower	rocky side	shrub	dicotyledons	deciduous shrubs	C3	non-nitrogen-fixing	Abelia chinensis	branch	above	7.11547
131	MRD	lower	rocky side	shrub	dicotyledons	deciduous shrubs	C3	non-nitrogen-fixing	Abelia chinensis	leaf	above	28.671
132	MRD	lower	rocky side	shrub	dicotyledons	deciduous shrubs	C3	non-nitrogen-fixing	Abelia chinensis	root	below	6.03835
133	MRD	lower	rocky side	herb	dicotyledons	perennial herbs	C4	non-nitrogen-fixing	Aster baccharoides	leaf	above	21.996
134	MRD	lower	rocky side	herb	dicotyledons	perennial herbs	C4	non-nitrogen-fixing	Aster baccharoides	root	below	9.95861
135	MRD	lower	rocky side	herb	monocotyledons	perennial herbs	C4	non-nitrogen-fixing	Imperata cylindrica	leaf	above	9.57694
136	MRD	middle	non-rocky side	shrub	dicotyledons	deciduous shrubs	C3	nitrogen-fixing	Indigofera tinctoria	branch	above	15.7444
137	MRD	middle	non-rocky side	shrub	dicotyledons	deciduous shrubs	C3	nitrogen-fixing	Indigofera tinctoria	leaf	above	36.8706
138	MRD	middle	non-rocky side	shrub	dicotyledons	deciduous shrubs	C3	nitrogen-fixing	Indigofera tinctoria	root	below	5.81945
139	MRD	middle	non-rocky side	shrub	dicotyledons	evergreen shrubs	C3	nitrogen-fixing	Elaeagnus pungens	branch	above	4.41482
140	MRD	middle	non-rocky side	shrub	dicotyledons	evergreen shrubs	C3	nitrogen-fixing	Elaeagnus pungens	leaf	above	21.5379
141	MRD	middle	non-rocky side	shrub	dicotyledons	evergreen shrubs	C3	nitrogen-fixing	Elaeagnus pungens	root	below	5.37437
142	MRD	middle	non-rocky side	shrub	dicotyledons	deciduous shrubs	C3	non-nitrogen-fixing	Rhus chinensis	branch	above	12.6235
143	MRD	middle	non-rocky side	shrub	dicotyledons	deciduous shrubs	C3	non-nitrogen-fixing	Rhus chinensis	leaf	above	28.1622
144	MRD	middle	non-rocky side	shrub	dicotyledons	deciduous shrubs	C3	non-nitrogen-fixing	Rhus chinensis	root	below	8.92167
145	MRD	middle	non-rocky side	herb	monocotyledons	perennial herbs	C4	non-nitrogen-fixing	Themeda japonica	leaf	above	7.19854
146	MRD	middle	non-rocky side	herb	monocotyledons	perennial herbs	C4	non-nitrogen-fixing	Themeda japonica	root	below	7.91147
147	MRD	middle	non-rocky side	herb	dicotyledons	perennial herbs	C3	non-nitrogen-fixing	Clinopodium chinense	leaf	above	18.5235
148	MRD	middle	non-rocky side	herb	dicotyledons	perennial herbs	C3	non-nitrogen-fixing	Clinopodium chinense	root	below	4.71433
149	MRD	middle	non-rocky side	shrub	dicotyledons	evergreen shrubs	C3	non-nitrogen-fixing	Pyracantha fortuneana	branch	above	12.8356
150	MRD	middle	non-rocky side	shrub	dicotyledons	evergreen shrubs	C3	non-nitrogen-fixing	Pyracantha fortuneana	leaf	above	26.7455
151	MRD	middle	non-rocky side	shrub	dicotyledons	evergreen shrubs	C3	non-nitrogen-fixing	Pyracantha fortuneana	root	below	31.863
152	MRD	middle	non-rocky side	shrub	dicotyledons	deciduous shrubs	C3	non-nitrogen-fixing	Abelia chinensis	branch	above	6.29125
153	MRD	middle	non-rocky side	shrub	dicotyledons	deciduous shrubs	C3	non-nitrogen-fixing	Abelia chinensis	leaf	above	28.5083
154	MRD	middle	non-rocky side	shrub	dicotyledons	deciduous shrubs	C3	non-nitrogen-fixing	Abelia chinensis	root	below	4.94345
155	MRD	middle	non-rocky side	herb	dicotyledons	perennial herbs	C3	non-nitrogen-fixing	Sanguisorba officinalis	leaf	above	27.7656
156	MRD	middle	non-rocky side	herb	dicotyledons	perennial herbs	C3	non-nitrogen-fixing	Sanguisorba officinalis	root	below	40.1419
157	MRD	middle	non-rocky side	herb	dicotyledons	perennial herbs	C4	non-nitrogen-fixing	Aster baccharoides	leaf	above	24.0256
158	MRD	middle	non-rocky side	herb	dicotyledons	perennial herbs	C4	non-nitrogen-fixing	Aster baccharoides	root	below	10.1044
159	MRD	middle	rocky side	shrub	dicotyledons	deciduous shrubs	C3	non-nitrogen-fixing	Liquidambar formosana	branch	above	13.9528
160	MRD	middle	rocky side	shrub	dicotyledons	deciduous shrubs	C3	non-nitrogen-fixing	Liquidambar formosana	leaf	above	22.5061
161	MRD	middle	rocky side	shrub	dicotyledons	deciduous shrubs	C3	non-nitrogen-fixing	Liquidambar formosana	root	below	23.107
162	MRD	middle	rocky side	shrub	dicotyledons	deciduous shrubs	C4	non-nitrogen-fixing	Mallotus apelta	branch	above	32.9688
163	MRD	middle	rocky side	shrub	dicotyledons	deciduous shrubs	C4	non-nitrogen-fixing	Mallotus apelta	leaf	above	34.0039
164	MRD	middle	rocky side	shrub	dicotyledons	deciduous shrubs	C4	non-nitrogen-fixing	Mallotus apelta	root	below	8.99155
165	MRD	middle	rocky side	shrub	dicotyledons	deciduous shrubs	C3	nitrogen-fixing	Indigofera tinctoria	branch	above	16.8144
166	MRD	middle	rocky side	shrub	dicotyledons	deciduous shrubs	C3	nitrogen-fixing	Indigofera tinctoria	leaf	above	40.2377
167	MRD	middle	rocky side	shrub	dicotyledons	deciduous shrubs	C3	nitrogen-fixing	Indigofera tinctoria	root	below	7.09101
168	MRD	middle	rocky side	herb	monocotyledons	perennial herbs	C4	non-nitrogen-fixing	Themeda japonica	leaf	above	9.22532
169	MRD	middle	rocky side	herb	monocotyledons	perennial herbs	C4	non-nitrogen-fixing	Themeda japonica	root	below	3.94303
170	MRD	middle	rocky side	herb	dicotyledons	perennial herbs	C4	non-nitrogen-fixing	Dendranthema indicum	leaf	above	24.1347
171	MRD	middle	rocky side	herb	dicotyledons	perennial herbs	C4	non-nitrogen-fixing	Dendranthema indicum	root	below	7.39306
172	MRD	middle	rocky side	herb	dicotyledons	annual herbs	C3	non-nitrogen-fixing	Salvia plebeia	leaf	above	19.7677
173	MRD	middle	rocky side	herb	dicotyledons	annual herbs	C3	non-nitrogen-fixing	Salvia plebeia	root	below	3.07704
174	MRD	upper	non-rocky side	shrub	dicotyledons	deciduous shrubs	C3	non-nitrogen-fixing	Abelia chinensis	branch	above	5.07253
175	MRD	upper	non-rocky side	shrub	dicotyledons	deciduous shrubs	C3	non-nitrogen-fixing	Abelia chinensis	leaf	above	28.9191
176	MRD	upper	non-rocky side	shrub	dicotyledons	deciduous shrubs	C3	non-nitrogen-fixing	Abelia chinensis	root	below	4.04677
177	MRD	upper	non-rocky side	shrub	dicotyledons	deciduous shrubs	C3	non-nitrogen-fixing	Castanea henryi	branch	above	15.1786
178	MRD	upper	non-rocky side	shrub	dicotyledons	deciduous shrubs	C3	non-nitrogen-fixing	Castanea henryi	leaf	above	15.6518
179	MRD	upper	non-rocky side	shrub	dicotyledons	deciduous shrubs	C3	non-nitrogen-fixing	Castanea henryi	root	below	25.4381
180	MRD	upper	non-rocky side	shrub	dicotyledons	deciduous shrubs	C4	non-nitrogen-fixing	Glochidion puberum	branch	above	12.3246
181	MRD	upper	non-rocky side	shrub	dicotyledons	deciduous shrubs	C4	non-nitrogen-fixing	Glochidion puberum	leaf	above	26.9905
182	MRD	upper	non-rocky side	shrub	dicotyledons	deciduous shrubs	C4	non-nitrogen-fixing	Glochidion puberum	root	below	13.642
183	MRD	upper	non-rocky side	herb	dicotyledons	perennial herbs	C3	non-nitrogen-fixing	Clinopodium chinense	leaf	above	14.1102
184	MRD	upper	non-rocky side	herb	dicotyledons	perennial herbs	C3	non-nitrogen-fixing	Clinopodium chinense	root	below	3.01901
185	MRD	upper	non-rocky side	herb	dicotyledons	perennial herbs	C4	non-nitrogen-fixing	Sonchus arvensis	leaf	above	22.8543
186	MRD	upper	non-rocky side	herb	dicotyledons	perennial herbs	C4	non-nitrogen-fixing	Sonchus arvensis	root	below	7.92352
187	MRD	upper	non-rocky side	herb	monocotyledons	perennial herbs	C4	non-nitrogen-fixing	Imperata cylindrica	leaf	above	7.75832
188	MRD	upper	non-rocky side	shrub	dicotyledons	deciduous shrubs	C3	non-nitrogen-fixing	Rhus chinensis	branch	above	13.1242
189	MRD	upper	non-rocky side	shrub	dicotyledons	deciduous shrubs	C3	non-nitrogen-fixing	Rhus chinensis	leaf	above	19.2182
190	MRD	upper	non-rocky side	shrub	dicotyledons	deciduous shrubs	C3	non-nitrogen-fixing	Rhus chinensis	root	below	13.1198
191	MRD	upper	non-rocky side	shrub	dicotyledons	evergreen shrubs	C3	non-nitrogen-fixing	Ilex chinensis	branch	above	18.0514
192	MRD	upper	non-rocky side	shrub	dicotyledons	evergreen shrubs	C3	non-nitrogen-fixing	Ilex chinensis	leaf	above	17.7674
193	MRD	upper	non-rocky side	shrub	dicotyledons	evergreen shrubs	C3	non-nitrogen-fixing	Ilex chinensis	root	below	8.75287
194	MRD	upper	non-rocky side	shrub	dicotyledons	deciduous shrubs	C3	non-nitrogen-fixing	Grewia biloba	branch	above	23.9206
195	MRD	upper	non-rocky side	shrub	dicotyledons	deciduous shrubs	C3	non-nitrogen-fixing	Grewia biloba	leaf	above	25.2181
196	MRD	upper	non-rocky side	shrub	dicotyledons	deciduous shrubs	C3	non-nitrogen-fixing	Grewia biloba	root	below	17.672
197	MRD	upper	non-rocky side	herb	monocotyledons	annual herbs	C4	non-nitrogen-fixing	Digitaria sanguinalis	leaf	above	9.79622
198	MRD	upper	non-rocky side	herb	monocotyledons	annual herbs	C4	non-nitrogen-fixing	Digitaria sanguinalis	root	below	3.42677
199	MRD	upper	non-rocky side	herb	monocotyledons	perennial herbs	C4	non-nitrogen-fixing	Miscanthus sinensis	leaf	above	4.82358
200	MRD	upper	non-rocky side	herb	monocotyledons	perennial herbs	C4	non-nitrogen-fixing	Miscanthus sinensis	root	below	3.44193
201	MRD	upper	rocky side	shrub	dicotyledons	evergreen shrubs	C3	non-nitrogen-fixing	Ilex cornuta	branch	above	11.0573
202	MRD	upper	rocky side	shrub	dicotyledons	evergreen shrubs	C3	non-nitrogen-fixing	Ilex cornuta	leaf	above	19.6814
203	MRD	upper	rocky side	shrub	dicotyledons	evergreen shrubs	C3	non-nitrogen-fixing	Ilex cornuta	root	below	6.23016
204	MRD	upper	rocky side	shrub	dicotyledons	evergreen shrubs	C3	non-nitrogen-fixing	Loropetalum chinense	branch	above	10.331
205	MRD	upper	rocky side	shrub	dicotyledons	evergreen shrubs	C3	non-nitrogen-fixing	Loropetalum chinense	leaf	above	33.4369
206	MRD	upper	rocky side	shrub	dicotyledons	evergreen shrubs	C3	non-nitrogen-fixing	Loropetalum chinense	root	below	13.8182
207	MRD	upper	rocky side	shrub	dicotyledons	deciduous shrubs	C3	non-nitrogen-fixing	Vitex negundo	branch	above	5.53024
208	MRD	upper	rocky side	shrub	dicotyledons	deciduous shrubs	C3	non-nitrogen-fixing	Vitex negundo	leaf	above	23.0104
209	MRD	upper	rocky side	shrub	dicotyledons	deciduous shrubs	C3	non-nitrogen-fixing	Vitex negundo	root	below	5.92502
210	MRD	upper	rocky side	herb	dicotyledons	annual herbs	C4	non-nitrogen-fixing	Artemisia carvifolia	leaf	above	16.355
211	MRD	upper	rocky side	herb	dicotyledons	annual herbs	C4	non-nitrogen-fixing	Artemisia carvifolia	root	below	14.0675
212	MRD	upper	rocky side	herb	dicotyledons	perennial herbs	C3	non-nitrogen-fixing	Viola triangulifolia	leaf	above	27.6892
213	MRD	upper	rocky side	herb	dicotyledons	perennial herbs	C3	non-nitrogen-fixing	Viola triangulifolia	root	below	12.2341
214	MRD	upper	rocky side	shrub	monocotyledons	evergreen shrubs	C3	non-nitrogen-fixing	Smilax china	branch	above	5.77336
215	MRD	upper	rocky side	shrub	monocotyledons	evergreen shrubs	C3	non-nitrogen-fixing	Smilax china	leaf	above	22.9863
216	MRD	upper	rocky side	shrub	monocotyledons	evergreen shrubs	C3	non-nitrogen-fixing	Smilax china	root	below	5.9282
217	IRD	lower	non-rocky side	shrub	dicotyledons	evergreen shrubs	C3	non-nitrogen-fixing	Loropetalum chinense	branch	above	29.7081
218	IRD	lower	non-rocky side	shrub	dicotyledons	evergreen shrubs	C3	non-nitrogen-fixing	Loropetalum chinense	leaf	above	29.7521
219	IRD	lower	non-rocky side	shrub	dicotyledons	evergreen shrubs	C3	non-nitrogen-fixing	Loropetalum chinense	root	below	23.6269
220	IRD	lower	non-rocky side	shrub	dicotyledons	evergreen shrubs	C3	non-nitrogen-fixing	Rosa laevigata	branch	above	23.3521
221	IRD	lower	non-rocky side	shrub	dicotyledons	evergreen shrubs	C3	non-nitrogen-fixing	Rosa laevigata	leaf	above	18.3166
222	IRD	lower	non-rocky side	shrub	dicotyledons	evergreen shrubs	C3	non-nitrogen-fixing	Rosa laevigata	root	below	12.0831
223	IRD	lower	non-rocky side	shrub	dicotyledons	deciduous shrubs	C3	non-nitrogen-fixing	Abelia chinensis	branch	above	12.2977
224	IRD	lower	non-rocky side	shrub	dicotyledons	deciduous shrubs	C3	non-nitrogen-fixing	Abelia chinensis	leaf	above	27.7054
225	IRD	lower	non-rocky side	shrub	dicotyledons	deciduous shrubs	C3	non-nitrogen-fixing	Abelia chinensis	root	below	7.11679
226	IRD	lower	non-rocky side	herb	monocotyledons	perennial herbs	C4	non-nitrogen-fixing	Imperata cylindrica	leaf	above	6.23172
227	IRD	lower	non-rocky side	herb	monocotyledons	perennial herbs	C4	non-nitrogen-fixing	Imperata cylindrica	root	below	4.34615
228	IRD	lower	non-rocky side	herb	monocotyledons	perennial herbs	C4	non-nitrogen-fixing	Themeda japonica	leaf	above	4.65946
229	IRD	lower	non-rocky side	herb	monocotyledons	perennial herbs	C4	non-nitrogen-fixing	Themeda japonica	root	below	5.49085
230	IRD	lower	non-rocky side	shrub	dicotyledons	deciduous shrubs	C3	nitrogen-fixing	Indigofera tinctoria	branch	above	13.9063
231	IRD	lower	non-rocky side	shrub	dicotyledons	deciduous shrubs	C3	nitrogen-fixing	Indigofera tinctoria	leaf	above	32.8143
232	IRD	lower	non-rocky side	shrub	dicotyledons	deciduous shrubs	C3	nitrogen-fixing	Indigofera tinctoria	root	below	7.58325
233	IRD	lower	non-rocky side	shrub	dicotyledons	evergreen shrubs	C3	non-nitrogen-fixing	Serissa japonica	branch	above	12.0755
234	IRD	lower	non-rocky side	shrub	dicotyledons	evergreen shrubs	C3	non-nitrogen-fixing	Serissa japonica	leaf	above	32.2588
235	IRD	lower	non-rocky side	shrub	dicotyledons	evergreen shrubs	C3	non-nitrogen-fixing	Serissa japonica	root	below	6.59747
236	IRD	lower	non-rocky side	shrub	dicotyledons	deciduous shrubs	C3	non-nitrogen-fixing	Vitex negundo	branch	above	15.6042
237	IRD	lower	non-rocky side	shrub	dicotyledons	deciduous shrubs	C3	non-nitrogen-fixing	Vitex negundo	leaf	above	21.2133
238	IRD	lower	non-rocky side	shrub	dicotyledons	deciduous shrubs	C3	non-nitrogen-fixing	Vitex negundo	root	below	8.16568
239	IRD	lower	non-rocky side	herb	monocotyledons	perennial herbs	C4	non-nitrogen-fixing	Imperata cylindrica	leaf	above	5.98053
240	IRD	lower	non-rocky side	herb	monocotyledons	perennial herbs	C4	non-nitrogen-fixing	Imperata cylindrica	root	below	3.56917
241	IRD	lower	non-rocky side	shrub	dicotyledons	deciduous shrubs	C3	non-nitrogen-fixing	Castanea henryi	branch	above	29.9301
242	IRD	lower	non-rocky side	shrub	dicotyledons	deciduous shrubs	C3	non-nitrogen-fixing	Castanea henryi	leaf	above	25.0893
243	IRD	lower	non-rocky side	shrub	dicotyledons	deciduous shrubs	C3	non-nitrogen-fixing	Castanea henryi	root	below	25.0074
244	IRD	lower	non-rocky side	shrub	dicotyledons	deciduous shrubs	C3	nitrogen-fixing	Indigofera tinctoria	branch	above	10.18
245	IRD	lower	non-rocky side	shrub	dicotyledons	deciduous shrubs	C3	nitrogen-fixing	Indigofera tinctoria	leaf	above	34.6254
246	IRD	lower	non-rocky side	shrub	dicotyledons	deciduous shrubs	C3	nitrogen-fixing	Indigofera tinctoria	root	below	3.95286
247	IRD	lower	non-rocky side	shrub	dicotyledons	deciduous shrubs	C3	non-nitrogen-fixing	Abelia chinensis	branch	above	9.2187
248	IRD	lower	non-rocky side	shrub	dicotyledons	deciduous shrubs	C3	non-nitrogen-fixing	Abelia chinensis	leaf	above	29.6401
249	IRD	lower	non-rocky side	shrub	dicotyledons	deciduous shrubs	C3	non-nitrogen-fixing	Abelia chinensis	root	below	5.49266
250	IRD	lower	non-rocky side	herb	dicotyledons	annual herbs	C4	non-nitrogen-fixing	Artemisia carvifolia	leaf	above	17.2827
251	IRD	lower	non-rocky side	herb	dicotyledons	annual herbs	C4	non-nitrogen-fixing	Artemisia carvifolia	root	below	6.38532
252	IRD	lower	rocky side	shrub	dicotyledons	deciduous shrubs	C3	non-nitrogen-fixing	Castanea henryi	branch	above	25.513
253	IRD	lower	rocky side	shrub	dicotyledons	deciduous shrubs	C3	non-nitrogen-fixing	Castanea henryi	leaf	above	22.8883
254	IRD	lower	rocky side	shrub	dicotyledons	deciduous shrubs	C3	non-nitrogen-fixing	Castanea henryi	root	below	31.3682
255	IRD	lower	rocky side	herb	dicotyledons	annual herbs	C4	non-nitrogen-fixing	Erigeron annuus	leaf	above	21.1101
256	IRD	lower	rocky side	herb	dicotyledons	annual herbs	C4	non-nitrogen-fixing	Erigeron annuus	root	below	3.48455
257	IRD	lower	rocky side	herb	dicotyledons	annual herbs	C4	non-nitrogen-fixing	Artemisia carvifolia	leaf	above	18.3198
258	IRD	lower	rocky side	herb	dicotyledons	annual herbs	C4	non-nitrogen-fixing	Artemisia carvifolia	root	below	7.01537
259	IRD	lower	rocky side	herb	monocotyledons	perennial herbs	C3	non-nitrogen-fixing	Ophiopogon japonicus	leaf	above	23.1076
260	IRD	lower	rocky side	herb	monocotyledons	perennial herbs	C3	non-nitrogen-fixing	Ophiopogon japonicus	root	below	15.4136
261	IRD	middle	non-rocky side	shrub	dicotyledons	deciduous shrubs	C3	non-nitrogen-fixing	Vitex negundo	branch	above	26.3139
262	IRD	middle	non-rocky side	shrub	dicotyledons	deciduous shrubs	C3	non-nitrogen-fixing	Vitex negundo	leaf	above	23.5943
263	IRD	middle	non-rocky side	shrub	dicotyledons	deciduous shrubs	C3	non-nitrogen-fixing	Vitex negundo	root	below	4.53143
264	IRD	middle	non-rocky side	shrub	dicotyledons	deciduous shrubs	C3	nitrogen-fixing	Indigofera tinctoria	branch	above	15.8287
265	IRD	middle	non-rocky side	shrub	dicotyledons	deciduous shrubs	C3	nitrogen-fixing	Indigofera tinctoria	leaf	above	34.5813
266	IRD	middle	non-rocky side	shrub	dicotyledons	deciduous shrubs	C3	nitrogen-fixing	Indigofera tinctoria	root	below	4.18326
267	IRD	middle	non-rocky side	herb	dicotyledons	perennial herbs	C4	non-nitrogen-fixing	Eupatorium chinense	leaf	above	31.2031
268	IRD	middle	non-rocky side	herb	dicotyledons	perennial herbs	C4	non-nitrogen-fixing	Eupatorium chinense	root	below	8.53816
269	IRD	middle	non-rocky side	herb	dicotyledons	perennial herbs	C3	non-nitrogen-fixing	Sanguisorba officinalis	leaf	above	26.4268
270	IRD	middle	non-rocky side	herb	dicotyledons	perennial herbs	C3	non-nitrogen-fixing	Sanguisorba officinalis	root	below	39.6341
271	IRD	middle	non-rocky side	shrub	dicotyledons	deciduous shrubs	C3	non-nitrogen-fixing	Abelia chinensis	branch	above	6.99138
272	IRD	middle	non-rocky side	shrub	dicotyledons	deciduous shrubs	C3	non-nitrogen-fixing	Abelia chinensis	leaf	above	27.5266
273	IRD	middle	non-rocky side	shrub	dicotyledons	deciduous shrubs	C3	non-nitrogen-fixing	Abelia chinensis	root	below	5.35477
274	IRD	middle	non-rocky side	shrub	dicotyledons	evergreen shrubs	C3	non-nitrogen-fixing	Serissa japonica	branch	above	9.68654
275	IRD	middle	non-rocky side	shrub	dicotyledons	evergreen shrubs	C3	non-nitrogen-fixing	Serissa japonica	leaf	above	28.5815
276	IRD	middle	non-rocky side	shrub	dicotyledons	evergreen shrubs	C3	non-nitrogen-fixing	Serissa japonica	root	below	16.6516
277	IRD	middle	non-rocky side	herb	dicotyledons	perennial herbs	C4	non-nitrogen-fixing	Aster baccharoides	leaf	above	16.2307
278	IRD	middle	non-rocky side	herb	dicotyledons	perennial herbs	C4	non-nitrogen-fixing	Aster baccharoides	root	below	6.1987
279	IRD	middle	non-rocky side	herb	monocotyledons	perennial herbs	C4	non-nitrogen-fixing	Imperata cylindrica	leaf	above	5.65422
280	IRD	middle	non-rocky side	herb	monocotyledons	perennial herbs	C4	non-nitrogen-fixing	Imperata cylindrica	root	below	4.09554
281	IRD	middle	rocky side	shrub	monocotyledons	evergreen shrubs	C3	non-nitrogen-fixing	Smilax china	branch	above	10.9213
282	IRD	middle	rocky side	shrub	monocotyledons	evergreen shrubs	C3	non-nitrogen-fixing	Smilax china	leaf	above	36.348
283	IRD	middle	rocky side	shrub	monocotyledons	evergreen shrubs	C3	non-nitrogen-fixing	Smilax china	root	below	8.61434
284	IRD	middle	rocky side	shrub	dicotyledons	evergreen shrubs	C3	non-nitrogen-fixing	Pyracantha fortuneana	branch	above	13.875
285	IRD	middle	rocky side	shrub	dicotyledons	evergreen shrubs	C3	non-nitrogen-fixing	Pyracantha fortuneana	leaf	above	29.7697
286	IRD	middle	rocky side	shrub	dicotyledons	evergreen shrubs	C3	non-nitrogen-fixing	Pyracantha fortuneana	root	below	17.0827
287	IRD	middle	rocky side	shrub	dicotyledons	deciduous shrubs	C4	non-nitrogen-fixing	Glochidion puberum	branch	above	21.5518
288	IRD	middle	rocky side	shrub	dicotyledons	deciduous shrubs	C4	non-nitrogen-fixing	Glochidion puberum	leaf	above	25.8384
289	IRD	middle	rocky side	shrub	dicotyledons	deciduous shrubs	C4	non-nitrogen-fixing	Glochidion puberum	root	below	12.3819
290	IRD	upper	non-rocky side	shrub	dicotyledons	deciduous shrubs	C3	non-nitrogen-fixing	Rhus chinensis	branch	above	10.5237
291	IRD	upper	non-rocky side	shrub	dicotyledons	deciduous shrubs	C3	non-nitrogen-fixing	Rhus chinensis	leaf	above	25.8281
292	IRD	upper	non-rocky side	shrub	dicotyledons	deciduous shrubs	C3	non-nitrogen-fixing	Rhus chinensis	root	below	13.4166
293	IRD	upper	non-rocky side	herb	dicotyledons	perennial herbs	C4	non-nitrogen-fixing	Dendranthema indicum	leaf	above	24.9578
294	IRD	upper	non-rocky side	herb	dicotyledons	perennial herbs	C4	non-nitrogen-fixing	Dendranthema indicum	root	below	5.08139
295	IRD	upper	non-rocky side	shrub	dicotyledons	deciduous shrubs	C3	nitrogen-fixing	Indigofera tinctoria	branch	above	10.5246
296	IRD	upper	non-rocky side	shrub	dicotyledons	deciduous shrubs	C3	nitrogen-fixing	Indigofera tinctoria	leaf	above	35.5086
297	IRD	upper	non-rocky side	shrub	dicotyledons	deciduous shrubs	C3	nitrogen-fixing	Indigofera tinctoria	root	below	3.39435
298	IRD	upper	non-rocky side	herb	dicotyledons	perennial herbs	C3	non-nitrogen-fixing	Clinopodium chinense	leaf	above	15.0342
299	IRD	upper	non-rocky side	herb	dicotyledons	perennial herbs	C3	non-nitrogen-fixing	Clinopodium chinense	root	below	3.37732
300	IRD	upper	non-rocky side	herb	dicotyledons	perennial herbs	C3	non-nitrogen-fixing	Sanguisorba officinalis	leaf	above	24.1835
301	IRD	upper	non-rocky side	herb	dicotyledons	perennial herbs	C3	non-nitrogen-fixing	Sanguisorba officinalis	root	below	35.8288
302	IRD	upper	non-rocky side	herb	monocotyledons	perennial herbs	C4	non-nitrogen-fixing	Miscanthus sinensis	leaf	above	7.59767
303	IRD	upper	non-rocky side	herb	monocotyledons	perennial herbs	C4	non-nitrogen-fixing	Miscanthus sinensis	root	below	13.1033
304	IRD	upper	rocky side	shrub	dicotyledons	evergreen shrubs	C3	non-nitrogen-fixing	Loropetalum chinense	branch	above	30.8877
305	IRD	upper	rocky side	shrub	dicotyledons	evergreen shrubs	C3	non-nitrogen-fixing	Loropetalum chinense	leaf	above	24.4436
306	IRD	upper	rocky side	shrub	dicotyledons	evergreen shrubs	C3	non-nitrogen-fixing	Loropetalum chinense	root	below	27.6886
307	IRD	upper	rocky side	shrub	dicotyledons	deciduous shrubs	C3	non-nitrogen-fixing	Abelia chinensis	branch	above	5.60552
308	IRD	upper	rocky side	shrub	dicotyledons	deciduous shrubs	C3	non-nitrogen-fixing	Abelia chinensis	leaf	above	20.8864
309	IRD	upper	rocky side	shrub	dicotyledons	deciduous shrubs	C3	non-nitrogen-fixing	Abelia chinensis	root	below	1.0708
310	IRD	upper	rocky side	herb	monocotyledons	annual herbs	C4	non-nitrogen-fixing	Setaria glauca	leaf	above	4.7277
311	IRD	upper	rocky side	herb	monocotyledons	annual herbs	C4	non-nitrogen-fixing	Setaria glauca	root	below	0.600371
312	IRD	upper	rocky side	herb	monocotyledons	annual herbs	C4	non-nitrogen-fixing	Digitaria sanguinalis	leaf	above	4.74751
313	IRD	upper	rocky side	herb	monocotyledons	annual herbs	C4	non-nitrogen-fixing	Digitaria sanguinalis	root	below	1.36499
sample	organt	mean(g•kg−1)	sd
LRD	aboveground	19.48	8.58
LRD	belowground	10.48	8.04
MRD	aboveground	19.42	9.05
MRD	belowground	11.11	8.53
IRD	aboveground	20.16	9.43
IRD	belowground	10.76	9.86
	aboveground part (g•kg−1)			belowground part(g•kg−1)
	LRD	MRD	IRD	LRD	MRD	IRD
monocotyledons	8.24±7.94	9.37±5.22	11±10.52	3±1.66	4.66±2.2	6.29±5.1
dicotyledons	21.17±7.36	21.07±8.48	22.02±8.11	12.06±7.97	12.33±8.74	12.15±10.61
deciduous shrubs	21.65±8.43	21.61±9.82	21.49±8.96	13.08±9.39	12.64±8.36	9.5±8.68
evergreen shrubs	20.53±7.78	19.16±8.73	23.57±8.94	12.81±8.02	13.57±8.68	16.05±7.69
perennial herbs	14.72±8.29	16.63±8.17	15.94±9.73	7.4±5.99	9.03±9.49	12.06±12.6
annual herbs	12.77±6.42	15.27±4.64	13.24±7.88	5.98±3.3	7.62±4.82	3.77±2.89
C3	20.92±7.61	20.35±8.92	22.12±8.77	13.05±8.63	12.9±9.74	13.63±11.21
C4	15.43±10.06	16.89±9.17	14.41±9.22	5.69±3.61	7.65±3.76	5.83±3.6
nitrogen-fixing plants	19.5±9.2	22.6±13.62	23.5±11.8	11.73±2.69	6.09±0.89	4.78±1.9
non-nitrogen-fixing plants	19.48±8.63	19.13±8.61	19.63±9.04	10.41±8.24	11.48±8.73	11.46±10.19
	aboveground part (g•kg−1)			belowground part(g•kg−1)
	LRD	MRD	IRD	LRD	MRD	IRD
monocotyledon	8.238	9.366	10.998	2.996	4.66	6.288
dicotyledon	21.174	21.071	22.024	12.063	12.334	12.148
Stdev of monocotyledon	7.942	5.216	10.52	1.664	2.197	5.102
Stdev of dicotyledon	7.356	8.483	8.11	7.969	8.744	10.61

## Sheet: Soil Ca content
LRD, light rocky desertification;
MRD, moderate rocky desertification;
IRD, intense rocky desertification.
TCa, total calcium;			Eca, exchange calcium
RecNumber	Sample areas	slope position	Small quadrats	Soil depth	Tca(g/kg)	Eca(g/kg)
1	LRD	upper	non-rocky side1	0-10	1.88959	0.441589
2	LRD	upper	non-rocky side1	10-20	1.77177	0.404808
3	LRD	upper	non-rocky side1	20-30	1.2822	0.676237
4	LRD	upper	non-rocky side2	0-10	2.01157	0.272487
5	LRD	upper	non-rocky side2	10-20	1.35199	0.453296
6	LRD	upper	non-rocky side2	20-30	1.27004	0.534968
7	LRD	upper	non-rocky side3	0-10	1.67806	0.89347
8	LRD	upper	non-rocky side3	10-20	1.47181	0.745278
9	LRD	upper	non-rocky side3	20-30	1.50844	0.566104
10	LRD	upper	rocky side	0-10	2.75472	1.52956
11	LRD	upper	rocky side	10-20	1.67863	1.42779
12	LRD	upper	rocky side	20-30	1.8842	1.45068
13	LRD	middle	non-rocky side1	0-10	1.60858	0.947931
14	LRD	middle	non-rocky side1	10-20	1.26113	0.837029
15	LRD	middle	non-rocky side1	20-30	1.90849	1.05116
16	LRD	middle	non-rocky side2	0-10	0.820921	0.316814
17	LRD	middle	non-rocky side2	10-20	0.954945	0.356072
18	LRD	middle	non-rocky side2	20-30	0.751154	0.449298
19	LRD	middle	non-rocky side3	0-10	1.1616	0.518641
20	LRD	middle	non-rocky side3	10-20	1.12075	0.448032
21	LRD	middle	non-rocky side3	20-30	1.19403	0.493917
22	LRD	middle	rocky side	0-10	1.17395	0.520943
23	LRD	middle	rocky side	10-20	1.38375	0.654976
24	LRD	middle	rocky side	20-30	2.05236	0.616954
25	LRD	lower	non-rocky side1	0-10	1.01885	0.725413
26	LRD	lower	non-rocky side1	10-20	0.900786	0.573812
27	LRD	lower	non-rocky side1	20-30	1.04865	0.697644
28	LRD	lower	non-rocky side2	0-10	0.103441	0.0195592
29	LRD	lower	non-rocky side2	10-20	0.872511	0.0615604
30	LRD	lower	non-rocky side2	20-30	0.811489	0.105023
31	LRD	lower	non-rocky side3	0-10	0.682683	0.279083
32	LRD	lower	non-rocky side3	10-20	0.965385	0.364341
33	LRD	lower	non-rocky side3	20-30	0.697474	0.534387
34	LRD	lower	rocky side	0-10	1.42488	0.919396
35	LRD	lower	rocky side	10-20	0.982476	0.746176
36	LRD	lower	rocky side	20-30	1.7755	0.876379
37	MRD	upper	non-rocky side1	0-10	2.57024	1.54936
38	MRD	upper	non-rocky side1	10-20	2.00657	1.54589
39	MRD	upper	non-rocky side1	20-30	2.8011	1.44696
40	MRD	upper	non-rocky side2	0-10	3.15183	2.17473
41	MRD	upper	non-rocky side2	10-20	3.12346	2.59692
42	MRD	upper	non-rocky side2	20-30	2.21717	2.18149
43	MRD	upper	non-rocky side3	10-20	1.94269	1.81953
44	MRD	upper	non-rocky side3	20-30	1.84989	1.5248
45	MRD	upper	rocky side	0-10	2.62182	1.77988
46	MRD	upper	rocky side	10-20	3.55715	1.72122
47	MRD	upper	rocky side	20-30	3.05367	1.74531
48	MRD	middle	non-rocky side1	0-10	2.06108	1.74342
49	MRD	middle	non-rocky side1	20-30	2.36753	1.99027
50	MRD	middle	non-rocky side2	0-10	2.4403	1.71244
51	MRD	middle	non-rocky side2	20-30	1.83163	1.61572
52	MRD	middle	rocky side	0-10	3.29683	2.25482
53	MRD	middle	rocky side	10-20	2.86534	2.10594
54	MRD	middle	rocky side	20-30	2.78604	2.23803
55	MRD	lower	non-rocky side1	0-10	2.06269	1.33803
56	MRD	lower	non-rocky side1	10-20	2.30421	1.47912
57	MRD	lower	non-rocky side1	20-30	3.15091	1.70063
58	MRD	lower	non-rocky side2	0-10	3.35574	1.74417
59	MRD	lower	non-rocky side2	10-20	2.45492	1.98516
60	MRD	lower	non-rocky side2	20-30	1.33501	1.09048
61	MRD	lower	non-rocky side3	0-10	2.12289	1.54583
62	MRD	lower	non-rocky side3	10-20	1.66133	1.31797
63	MRD	lower	non-rocky side3	20-30	2.20233	1.07771
64	MRD	lower	rocky side	0-10	2.89927	2.61747
65	MRD	lower	rocky side	10-20	2.95833	2.71556
66	MRD	lower	rocky side	20-30	2.72252	2.58997
67	IRD	upper	non-rocky side1	0-10	2.61814	1.37097
68	IRD	upper	non-rocky side1	10-20	2.79797	1.74484
69	IRD	upper	non-rocky side1	20-30	3.42476	1.93103
70	IRD	upper	non-rocky side2	0-10	2.16742	1.22875
71	IRD	upper	non-rocky side2	10-20	2.16818	1.42816
72	IRD	upper	non-rocky side2	20-30	1.65372	1.33611
73	IRD	upper	non-rocky side3	0-10	4.20781	3.3119
74	IRD	upper	non-rocky side3	10-20	4.16012	3.16356
75	IRD	upper	non-rocky side3	20-30	5.87361	3.47749
76	IRD	upper	rocky side	0-10	5.87815	2.94428
77	IRD	upper	rocky side	10-20	7.18748	3.1477
78	IRD	upper	rocky side	20-30	4.4989	1.98765
79	IRD	middle	non-rocky side1	0-10	3.07778	1.92555
80	IRD	middle	non-rocky side1	10-20	2.56101	1.45444
81	IRD	middle	non-rocky side1	20-30	2.75687	1.34872
82	IRD	middle	non-rocky side2	0-10	2.86254	1.60414
83	IRD	middle	non-rocky side2	10-20	2.74257	2.18709
84	IRD	middle	non-rocky side2	20-30	2.73325	2.378
85	IRD	middle	non-rocky side3	0-10	2.60687	2.28133
86	IRD	middle	non-rocky side3	10-20	2.90835	2.55038
87	IRD	middle	non-rocky side3	20-30	3.05696	2.58103
88	IRD	middle	rocky side	0-10	8.09343	3.64344
89	IRD	middle	rocky side	10-20	5.83231	3.06038
90	IRD	middle	rocky side	20-30	4.60844	2.49609
91	IRD	lower	non-rocky side1	0-10	1.86518	0.558528
92	IRD	lower	non-rocky side1	10-20	2.06266	1.41412
93	IRD	lower	non-rocky side1	20-30	1.52199	0.651799
94	IRD	lower	non-rocky side2	0-10	1.88196	0.953478
95	IRD	lower	non-rocky side2	10-20	2.13592	0.532693
96	IRD	lower	non-rocky side2	20-30	2.18596	0.744957
97	IRD	lower	non-rocky side3	0-10	1.09981	1.03848
98	IRD	lower	non-rocky side3	10-20	1.61662	0.45065
99	IRD	lower	non-rocky side3	20-30	2.10459	0.400796
100	IRD	lower	rocky side	0-10	6.0054	3.91771
101	IRD	lower	rocky side	10-20	5.12214	3.48524
102	IRD	lower	rocky side	20-30	3.69241	3.10926
Ca typical (g•kg-1)	sample point	LRD	MRD	IRD
total Ca	not rock side	1.19±0.45Aa	2.33±0.53Ba	2.62±0.97Ba
	rock side	1.68±0.53Ab	2.97±0.29Bb	5.66±1.37Cb
	average	1.31±0.51A	2.53±0.56B	3.38±1.71B
exchange Ca	not rock side	0.51±0.26Aa	1.68±0.37Ba	1.63±0.88Ba
	rock side	0.97±0.39Ab	2.20±0.39Bb	3.09±0.58Cb
	average	0.63±0.36A	1.83±0.44B	2.00±1.03C
Ca effectiveness	total/exchange ca （%）	47.72	72.55	58.98
